# Supplementary material
Source: publisher figshare collection journal article supplement (https://gsajournals.figshare.com/articles/dataset/_/12173385)

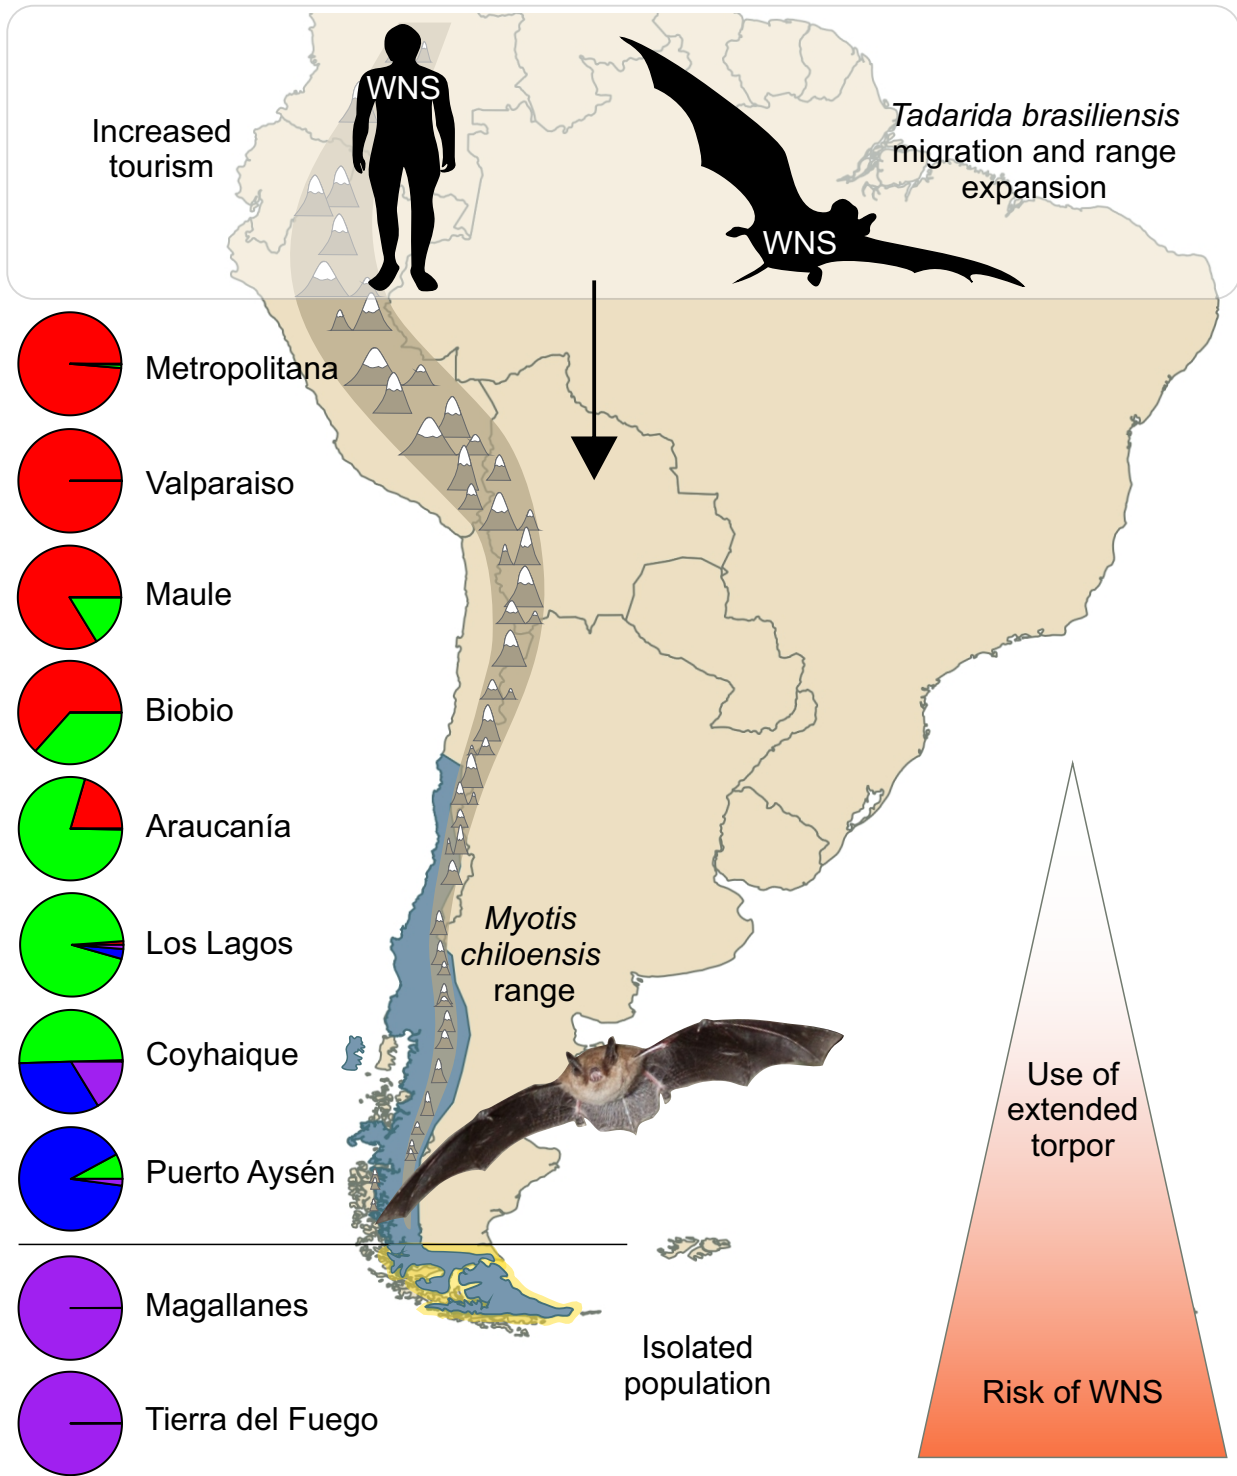

Supplement: Supplementary file 1 [file 2]
